# Supplementary material
Source: publisher figshare collection journal article supplement (https://gsapubs.figshare.com/ndownloader/files/23291273)
Supplement: Supplementary file 1 [file 23291273]

## Uranium-Series Dating

Samples masses ranged from 22 to 111 milligrams and were totally digested to avoid laboratory fractionation of U and Th, using a combination of nitric acid followed by concentrated hydrofluoric acid on the residue. A mixed spike solution containing known amounts of isotopically enriched  $^{236}\text{U}$  and  $^{229}\text{Th}$  was added to the digested sample and allowed to equilibrate prior to separation and purification of U and Th using anion-exchange chromatographic resins (AG1 $\times$ 8) in hydrochloric and nitric acid media. The isotopic compositions of U and Th were determined on a Finnigan MAT 262<sup>TM</sup> thermal ionization mass spectrometer equipped with a secondary electron multiplier operating in ion-counting mode. Uranium was loaded as a nitrate onto the evaporation side of a double rhenium-filament assembly and measured as metal ions. Thorium was loaded onto single, center rhenium filaments along with a graphite suspension. Total procedural blanks were small (0.02 and 0.10 nanograms of  $^{238}\text{U}$  and  $^{232}\text{Th}$ ) compared to abundances derived from the samples (9 to 1600 nanograms). Data were corrected for contributions from tracer solutions, procedural blank, and mass fractionation, and were normalized to a constant  $^{234}\text{U}/^{238}\text{U}$  value for NIST SRM 4321B uranium standard (atomic ratio of  $5.29 \times 10^{-5}$  or activity ratio of 0.966) using values measured in parallel with unknown samples. Activity ratios (AR) were calculated using accepted decay constants (Cheng et al., 2000; Jaffey et al., 1971). Multiple analyses of a secular equilibrium standard analyzed using the same methods gave  $^{234}\text{U}/^{238}\text{U}$  and  $^{230}\text{Th}/^{238}\text{U}$  AR within analytical error of unity. All errors are given at 95% confidence level and include within-run errors plus uncertainties propagated from blank, spike, and mass fractionation corrections, as well as external error derived from multiple analyses of a U isotope standard (SRM 4321b). The method for subtracting isotopic constituents

derived from non-authigenic (detrital) sources is discussed in the text.

### ***Cosmogenic $^{36}\text{Cl}$ Geochronology***

We employed cosmogenic  $^{36}\text{Cl}$  ( $t_{1/2} = 301$  kyr) to directly date the timing of deposition of lacustrine beach barriers. Chlorine-36 is one of the family of terrestrial cosmogenic nuclides (TCN) that are commonly employed to determine the time that rocks on geomorphic surfaces have been exposed to atmospheric radiation (Cerling and Craig, 1994). TCNs are produced by nuclear reactions between secondary cosmic-ray particles and rock material at and near the surface of the earth. TCNs accumulate in rock or sediment at a rate proportional to the cosmic-ray flux intensity and the abundance of target nuclides in minerals within the geologic material (Gosse and Phillips, 2001). Measuring the concentration of TCN in rock allows calculation of the duration of exposure to cosmic radiation because TCNs accumulate in rock at known rates that depend on altitude, latitude, and topographic shielding (Gosse and Phillips, 2001). This technique has been most commonly applied to rocks at the ground surface (surface-exposure method), and can also be applied to depositional features if the TCN concentration with depth is determined (profile method).

If deeply-shielded rock becomes exposed at the surface of the earth, either by erosion or abrasive transport, the TCN inventory will be small to nil; whereas, after some period of time has elapsed, the TCN inventory will be nearly all a result of cosmogenic production *in situ*. The nuclide systematics, however, are more complicated when a landform is constructed from previously-eroded materials (e.g., a lacustrine bar composed of gravel that was eroded from older alluvial-fan deposits). The TCN concentration (N) within such depositional features consists of two parts: (1) the TCN concentration that accumulates *in situ* since deposition of the particular

feature ( $N_{\text{dep}}$ ) and (2) the TCN concentration from cosmic-ray exposure during surface weathering, exhumation, and transport prior to final deposition, or the “inherited” component ( $N_{\text{in}}$ ). The inheritance builds up in clasts while they are being eroded from bedrock or transported, and (or) during residence in older sedimentary deposits that may have been re-eroded and redeposited to form the current feature. After final deposition in a feature, the  $N_{\text{dep}}$  is initially zero while the  $N_{\text{in}}$  concentration begins to decay. With time,  $N_{\text{dep}}$  increases and  $N_{\text{in}}$  decreases, and the TCN concentration within a sample becomes:

$$N = N_{\text{dep}} + N_{\text{in}} \quad (\text{eq. 1})$$

By substituting in the terms for cosmogenic production and decay (Lal, 1991), the concentration of  $^{36}\text{Cl}$  ( $N_{36}$ ) as a function of depth ( $z$ ), time ( $t$ ), and surface erosion rate ( $\varepsilon$ ) can be obtained:

$$N_{36}(z, \varepsilon, t) = \frac{P_{36}(z)}{\lambda + \varepsilon \Lambda_e^{-1}} (1 - e^{-\lambda t}) + N_{\text{in}} e^{-\lambda t}$$

In Equation (2),  $P_{36}(z)$  is the production rate of  $^{36}\text{Cl}$  (atoms  $\text{g}^{-1}$ ) as a function of depth,  $\lambda$  is the  $^{36}\text{Cl}$  decay constant ( $\lambda = \ln 2/t_{1/2} = 2.303 \times 10^{-6} \text{ a}^{-1}$ ),  $\varepsilon$  is the surface erosion rate ( $\text{g cm}^{-2} \text{ a}^{-1}$ ),  $\Lambda_e$  is the effective cosmic-ray attenuation length ( $\text{g cm}^{-2}$ ), and  $t$  is the depositional age of the deposit. The first term represents the  $^{36}\text{Cl}$  accumulation since deposition. The second term represents the decay of the inherited component. Therefore, if the inherited component of a sample can be uniquely determined, it is possible to calculate the  $^{36}\text{Cl}$  accumulation since deposition and thus determine the age of the feature.

The deposit age was modeled by obtaining a best fit between a calculated  $^{36}\text{Cl}$  inventory (as a function of depth) and the measured  $^{36}\text{Cl}$  profile. The best-fit match was identified by minimization of the sum of the  $\chi^2$  values for all of the samples in the profile, computed from the

differences between the calculated and measured values. Uncertainties in the ages were also calculated from the  $\chi^2$  variation. The modeled  $^{36}\text{Cl}$  depth inventories were calculated using the spreadsheet model CHLOE (CHLOrine-36 Exposure age) (Phillips and Plummer, 1996), which is based on the cosmogenic-nuclide production equations given by Gosse and Phillips (2001). The high-energy cosmic-ray flux is calculated on the basis of standard exponential attenuation with mass and depth and the spallation production rate is proportional to that flux. The model then uses this flux distribution as the source term for the calculation of the epithermal and thermal neutron fluxes by means of the diffusion equations given in Phillips et al. (2001). The spatial distributions of low-energy neutron fluxes are then used to calculate the  $^{36}\text{Cl}$  production by epithermal and thermal neutron absorption. Nuclide production parameters from Phillips et al. (2001) were employed. Use of alternative production parameters by Stone et al. (1996a, 1996b) would give ages that are younger by approximately 20 percent.

### **Modeling of profile age and uncertainties**

Cosmogenic  $^{36}\text{Cl}$  is produced in rocks and soils by three principal reactions: high-energy spallation of K and Ca and low-energy neutron absorption by Cl (Gosse and Phillips, 2001). The rate of production at any depth below the surface by the first two reactions depends on the concentrations of the target elements and the high-energy cosmic-ray flux at that depth. The high-energy cosmic-ray flux decreases exponentially with the cumulative mass traversed by the cosmic rays. Thus, production by these reactions can be calculated based on measurement of the bulk density, depth, and the concentrations of K and Ca in the sampled material.

Production by low-energy neutron absorption depends on the low-energy (thermal and epithermal) neutron fluxes and the Cl concentration. However, low-energy neutrons are produced by gradual deceleration of the high-energy flux and they can diffuse significant

distances while in the thermal energy range. The characteristics of the low-energy flux thus depend on bulk properties of the sampled material (Phillips and others, 2001). CHLOE therefore uses the average bulk chemical composition of the sampled profile to compute the depth distribution of the low-energy neutron fluxes. The computed neutron fluxes and the Cl concentrations measured at each depth sampled are then used to calculate the  $^{36}\text{Cl}$  production rate. In addition to production by the nucleonic component of the cosmic radiation, CHLOE also computes production rates due to primary and secondary effects of the cosmic-ray muon flux, using approaches analogous to those described above.

The profile age and age uncertainty were calculated by means of  $\chi^2$  fitting (Bevington and Robinson, 1992) of the  $^{36}\text{Cl}$  concentration data from the various depths to the  $^{36}\text{Cl}$  distribution modeled by CHLOE. The sum of chi-squared function ( $\chi^2$ ) was calculated for each age-erosion pair as follows:

$$\chi^2 = \sum_{i=1}^n \frac{(O_i - M_i)^2}{S_i^2}$$

where  $O_i$  is the observed  $^{36}\text{Cl}$  concentration at each depth interval (i) and  $M_i$  is the modeled value at the same depth. The number of concentration measurements is n.  $S_i$  is the standard deviation associated with the  $i^{\text{th}}$  data point as follows:

$$S_i = S_{i,36} + S_{\text{inheritance}} + S_{\text{other}}$$

where  $S_{i,36}$  is the standard deviation from the  $^{36}\text{Cl}$  analytical measurement,  $S_{\text{inheritance}}$  is the contribution to the total standard deviation from variability in the inherited  $^{36}\text{Cl}$  concentration, and  $S_{\text{other}}$  is the contribution from other sources of variability, principally analytical uncertainties in the chemical analyses, bulk densities, and other parameters, combined with uncertainties in the  $^{36}\text{Cl}$  production parameters. Values for  $S_{i,36}$  were taken directly from the AMS analyses.

$S_{inheritance}$  was estimated based on the the standard deviation of  $^{36}\text{Cl}$  of the deepest samples from the youngest of the barriers at Thorne Bar.

The  $^{36}\text{Cl}$  age (TB02-00, see fig. 7 in text) for the late Pleistocene barrier is  $17 \pm 8$  ka. A number of radiocarbon dates place this Lake Lahontan highstand between 14,800 and 17,365 cal ka (Adams and Wesnousky, 1998; Benson et al., 1990). Due to the very young age of this feature, its calculated depth-profile age is largely insensitive to erosion or aggradation, and thus any misfit of the calculated  $^{36}\text{Cl}$  concentration to the data can principally be attributed to variation in the inherited component. The average absolute error of the concentrations calculated for this depth profile based on the independent ages given above, relative to the measured concentrations, was 1.6%.  $S_{other}$  was estimated based on an empirical comparison of  $^{36}\text{Cl}$  ages with independently constrained ages for 30 surficial rock samples from the  $^{36}\text{Cl}$  calibration data set (Phillips and others, 2001) and was assigned a value of 8%. This value should incorporate systematic uncertainty due to errors in the assigned production rates, but the adequacy of this estimation is uncertain and difficult to assess inasmuch as the parameter calibration dataset was also used to estimate the systematic uncertainty. For each profile we also report the reduced sum of  $\chi^2$  ( $\chi_v^2$ , table 2 in text), which is the sum of  $\chi^2$ , as given above, divided by  $n$ , the number of samples in the profile. The magnitude of  $\chi_v^2$  is a measure of the goodness of fit of the data to the model. In general, for laboratory systems in which the model can be assured to provide a complete description, a  $\chi_v^2$  of less than one is considered a satisfactory fit (Bevington and Robinson, 1992). When dealing with environmental measurements for which the model may be incomplete, somewhat larger  $\chi_v^2$  are often considered acceptable. In the example given above (TB00-02),  $\chi_v^2$  was 0.04. Values of  $\chi_v^2$  this small in environmental data sets often indicate that the standard deviation in the denominator of the  $\chi_v^2$  equation have been overestimated, or at least

given conservatively large values. The effect of such an overestimation is to increase the magnitude of the calculated uncertainty bounds (i.e., to indicate that the uncertainties may well be overestimated). The large number of small  $\chi_v^2$  values for curve fits in this study probably indicates that the  $1\sigma$  uncertainty bounds we report are conservative.

CHLOE produces models of  $^{36}\text{Cl}$  concentrations at the sampled profile depths, subject to variation of three adjustable parameters: the profile inheritance ( $t_p$ ), the deposition age ( $t_d$ ), and the rate of surface aggradation/erosion ( $\epsilon$ ). Given reasonable independent constraints on these variables, the model output was fairly sensitive to the first two parameters, but relatively insensitive to the last one ( $\epsilon$ ). The fitting of calculated  $^{36}\text{Cl}$  concentrations to data was therefore restricted to aggradation/erosion rates limited between upper and lower bounds estimated for each site based on particle-size measurements and geological and pedological observations, as described above and in the Methods section in the text. The aggradation/erosion rate could potentially be used as a fitting parameter. However, in most cases, due to the weak sensitivity of the calculated  $^{36}\text{Cl}$  concentration to aggradation/erosion, there was insignificant variation of the reduced sum of  $\chi^2$  across the prescribed range of  $\epsilon$ . In this case, the midpoint of the range of  $\epsilon$  was used to calculate the best-estimate deposition age (i.e.,  $\epsilon$  was used as a fixed, rather than fitting, parameter). In a few cases, there was a significant minimum in the reduced sum of  $\chi^2$  within the prescribed range for  $\epsilon$  and in these cases this minimum was used to compute the best-estimate deposition age. However, use of the alternative criterion (midpoint of  $\epsilon$  range) would have resulted in little difference in the best estimates of deposition age. The result of this pattern of insensitivity was that the variation in  $\epsilon$  played a significant role in estimation of the uncertainty of the best-fit deposition age, but only a small role in estimating its actual value.

The array of reduced sum-of- $\chi^2$  values generated as described above was contoured. The best

age estimate corresponds to the minimum value (or, alternatively, the midpoint value) of the sum of  $\chi^2$  (in the  $t_d$  versus  $t_{inh}$  parameter space). One-standard-deviation uncertainty bounds were estimated from the maximum and minimum age limits of the  $\chi^2_{min} + \Delta\chi^2_v$  contour in the age-erosion parameter space.  $\chi^2_{min}$  is the minimum value of the calculated sum of  $\chi^2$  within the parameter space and  $\Delta\chi^2_v$  is the critical value of the change in sum-of- $\chi^2$  for a specified level of confidence and number of fitted parameters (e.g., Davis, 2002, Table A.4). For our problem, the appropriate level of confidence is 68.3% (corresponding to one standard deviation uncertainty) and two fitted parameters ( $t_d$  and  $t_{inh}$ ), giving a  $\Delta\chi^2_v$  of 2.30. The approach to uncertainty estimation described above is comprehensive (it includes potential systematic as well as random sources of uncertainty) and it includes an explicit evaluation of model accuracy, based on the fit of multiple samples within a single profile, as opposed to a single TCN age determination for which model error can only be estimated. We believe that the over-all uncertainty bounds calculated using this approach are conservative and are likely to overestimate, rather than underestimate, the actual uncertainties.

## REFERENCES CITED

- Benson, L. V., Currey, D. R., Dorn, R. I., Lajoie, K. R., Oviatt, C. G., Robinson, S. W., Smith, G. I., and Stine, S., 1990, Chronology of expansion and contraction of four Great Basin lake systems during the past 35,000 years: *Palaeogeography, Palaeoclimatology, Palaeoecology*, v. 78, p. 241-286.
- Bevington, P. R., and Robinson, D. K., 1992, *Data Reduction and Error Analysis for the Physical Sciences*, Series, New York, McGraw-Hill, 328 p.



- Cerling, T. E., and Craig, H., 1994, Geomorphology and in-situ cosmogenic isotopes: Annual Review of Earth and Planetary Science, v. 22, p. 273-317.
- Davis, J. C., 2002, Statistics and Data Analysis in Geology, Series, New York, John Wiley & Sons, 638 p.
- Cheng, H., Edwards, R.L., Hoff, J., Gallup, C.D., Richards, D.A., and Asmerom, Yemane, 2000, The half-lives of uranium-234 and thorium-230: Chemical Geology, v. 169, p. 17-33.
- Gosse, J.C., and Phillips, F.M., 2001, Terrestrial in situ cosmogenic nuclides: theory and application: Quaternary Science Reviews, v. 20, p. 1475-1560.
- Jaffey, A.H., Flynn, K.F., Glendenin, L.E., Bentley, W.C., and Essling, A.M., 1971, Precision measurements of half-lives and specific activities of  $^{235}\text{U}$  and  $^{238}\text{U}$ : Physical Review C, v. 4, p. 1889-1906.
- Lal, D., 1991, Cosmic-ray labeling of erosion surfaces : in situ production rates and erosion models: Earth and Planetary Science Letters, v. 104, p. 424-439.
- Phillips, F. M., Stone, W. D., and Fabryka-Martin, J. T., 2001, An improved approach to calculating low-energy cosmic-ray neutron fluxes near the land/atmosphere interface: Chemical Geology, v. 175, p. 689-701.
- Phillips, F. M., and Plummer, M. A., 1996, CHLOE: A program for interpreting *in-situ* cosmogenic nuclide data for surface exposure dating and erosion studies: Radiocarbon (Abstracts 7<sup>th</sup> International Conference on Accelerator Mass Spectrometry), v. 38, p. 98-99.
- Stone, J., Evans, J., Fifield, K., Cresswell, R., and Allan, G., 1996a, Cosmogenic chlorine-36 production rates from calcium and potassium: Radiocarbon, v. 38, p. 170-171.
- Stone, J. O., Allan, G. L., Fifield, L. K., and Cresswell, R. G., 1996b, Cosmogenic chlorine-36 from calcium spallation: Geochimica et Cosmochimica Acta, v. 60, p. 679-692.

DR2011009

Table DR1. Laboratory data for soil profiles, Thorne Bar (no samples analyzed for profile TB02-00) and Columbus Salt Marsh [N.D., not determined]

| Sample Number*     | Depth (cm) | Thick (cm) | Excav. bulk density (g/cm <sup>3</sup> ) <sup>1</sup> | Ped bulk density (g/cm <sup>3</sup> ) <sup>2</sup> | Calc. <2mm bulk density (g/cm <sup>3</sup> ) <sup>3</sup> | CaCO <sub>3</sub> % | Soluble salt % | Gypsum % | Estimated field gravel (vol. %) | Laboratory gravel (wt. %) | Sand % | Silt % | Clay % |
|--------------------|------------|------------|-------------------------------------------------------|----------------------------------------------------|-----------------------------------------------------------|---------------------|----------------|----------|---------------------------------|---------------------------|--------|--------|--------|
| TB00-01            |            |            |                                                       |                                                    |                                                           |                     |                |          |                                 |                           |        |        |        |
| Av                 | 0-7        | 7          | N.D.                                                  | 1.29                                               | 1.23                                                      | 5.7                 | 0.051          | 0.002    | <10                             | 19                        | 74.5   | 19.0   | 6.4    |
| Bw                 | 7-20       | 13         | N.D.                                                  | 1.56                                               | 1.49                                                      | 5.4                 | 0.060          | 0.002    | 25                              | 64                        | 56.7   | 31.3   | 11.9   |
| 2Bwk1              | 20-32      | 12         | N.D.                                                  | 2.20                                               | 1.26                                                      | 6.1                 | 0.079          | 0.002    | 60                              | 73                        | 80.7   | 13.4   | 5.9    |
| 2Bwk2              | 32-51      | 19         | N.D.                                                  | 2.20 e <sup>4</sup>                                | 1.26                                                      | 6.7                 | 0.213          | 0.002    | 60                              | 72                        | 81.9   | 14.2   | 3.9    |
| 2Bk1               | 51-78      | 27         | 1.63                                                  | 1.74                                               | 1.23                                                      | 8.9                 | 1.311          | 0.008    | 50                              | 78                        | 81.3   | 13.9   | 4.8    |
| 2Bk2               | 78-114     | 36         | 2.07                                                  | 2.05                                               | 1.23                                                      | 4.2                 | 0.917          | 0.009    | 75                              | 87                        | 51.3   | 39.8   | 8.9    |
| 2C                 | 114-200+   | 86+        | N.D.                                                  | 2.01                                               | 1.23                                                      | 9.3                 | 0.315          | 0.003    | 90                              | 81                        | 47.2   | 45.3   | 7.5    |
| TB00-02            |            |            |                                                       |                                                    |                                                           |                     |                |          |                                 |                           |        |        |        |
| Av                 | 0-11       | 11         | N.D.                                                  | 1.60                                               | 1.59                                                      | 2.7                 | 0.057          | 0.002    | 15                              | 15                        | 71.0   | 20.9   | 8.2    |
| Btk                | 11-30      | 19         | N.D.                                                  | 1.43                                               | 1.33                                                      | 3.2                 | 0.083          | 0.002    | 20                              | 34                        | 79.6   | 14.4   | 6.0    |
| 2Bk                | 30-85      | 55         | N.D.                                                  | 1.69                                               | 1.52                                                      | 6.7                 | 0.304          | 0.002    | 50                              | 47                        | 58.8   | 37.0   | 4.3    |
| 2/3Bk              | 85-125     | 40         | N.D.                                                  | 1.89                                               | 1.71                                                      | 3.9                 | 0.400          | 0.003    | 50                              | 57                        | 60.6   | 31.9   | 7.5    |
| 3Btjk <sup>5</sup> | 125-156    | 31         | N.D.                                                  | 2.07                                               | 1.61                                                      | 3.7                 | 0.341          | 0.002    | 75                              | 71                        | 64.4   | 28.5   | 7.1    |
| 3Btj <sup>5</sup>  | 156-200+   | 44+        | N.D.                                                  | 2.25                                               | 1.54                                                      | 4.4                 | 0.674          | 0.007    | 75                              | 76                        | 72.3   | 19.1   | 8.6    |
| TB00-03            |            |            |                                                       |                                                    |                                                           |                     |                |          |                                 |                           |        |        |        |
| Av                 | 0-8        | 8          | N.D.                                                  | 1.59                                               | 1.59                                                      | 3.0                 | 0.145          | 0.003    | 15                              | 12                        | 83.0   | 13.1   | 3.9    |
| Av/Bw              | 8-19       | 11         | N.D.                                                  | 1.42                                               | 1.35                                                      | 3.6                 | 0.108          | 0.002    | 15                              | 9                         | 51.3   | 31.9   | 16.8   |
| Btk                | 19-30      | 11         | N.D.                                                  | 1.43                                               | 1.19                                                      | 4.4                 | 0.400          | 0.003    | 50                              | 45                        | 61.6   | 28.9   | 9.5    |
| 2Btky              | 30-48      | 18         | 2.06                                                  | 1.43 e                                             | 1.23                                                      | 4.4                 | 0.547          | 0.004    | 60                              | 65                        | 64.6   | 29.4   | 6.0    |
| 2Bkm               | 48-60      | 12         | N.D.                                                  | 1.63                                               | 1.36                                                      | 5.9                 | 0.457          | 0.003    | 60                              | 79                        | 40.9   | 41.3   | 17.8   |
| 3Bk                | 60-162     | 102        | 2.14                                                  | 1.79                                               | 1.30                                                      | 6.1                 | 0.411          | 0.003    | 90                              | 81                        | 45.6   | 46.7   | 7.8    |
| 4C                 | 162-210+   | 48+        | N.D.                                                  | 2.15                                               | 1.77                                                      | 2.9                 | 0.193          | 0.003    | 90                              | 83                        | 60.5   | 33.4   | 6.1    |
| TB00-04            |            |            |                                                       |                                                    |                                                           |                     |                |          |                                 |                           |        |        |        |
| Av                 | 0-7        | 7          | N.D.                                                  | 1.68                                               | 1.52                                                      | 2.7                 | 0.264          | 0.007    | 10                              | 27                        | 23.1   | 51.0   | 26.0   |
| Btk1               | 7-15       | 8          | N.D.                                                  | 1.74                                               | 1.47                                                      | 4.1                 | 1.153          | 0.008    | 20                              | 67                        | 10.8   | 62.2   | 27.0   |
| Btky2              | 15-31      | 16         | N.D.                                                  | 1.74 e                                             | 1.20                                                      | 3.0                 | 1.831          | 0.217    | 60                              | 72                        | 7.0    | 76.6   | 16.4   |
| Btky3              | 31-49      | 18         | 2.18                                                  | 1.74 e                                             | 1.20                                                      | 8.8                 | 0.685          | 0.008    | 60                              | 62                        | 44.8   | 46.6   | 8.6    |
| 2Bk                | 49-67      | 18         | 1.09                                                  | 1.74 e                                             | 1.10                                                      | 4.4                 | 1.363          | 0.004    | 0                               | 1                         | 48.6   | 45.9   | 5.4    |
| 3Btk               | 67-108     | 41         | 2.33                                                  | 1.53                                               | 1.50                                                      | 4.2                 | 0.951          | 0.003    | 80                              | 76                        | 33.0   | 51.5   | 15.5   |
| 4Bk                | 108-151    | 43         | N.D.                                                  | 1.70                                               | 1.62                                                      | 5.3                 | 0.764          | 0.002    | 15                              | 23                        | 56.9   | 38.2   | 4.9    |
| 5Bk                | 151-230+   | 79+        | N.D.                                                  | 2.19                                               | 1.31                                                      | 3.1                 | 0.669          | 0.002    | 90                              | 93                        | 76.6   | 19.2   | 4.2    |

Table DR1. Laboratory data for soil profiles, Thorne Bar (no samples analyzed for profile TB02-00) and Columbus Salt Marsh [N.D., not determined]

| Sample Number* | Depth (cm) | Thick (cm) | Excav. bulk density (g/cm <sup>3</sup> ) <sup>1</sup> | Ped bulk density (g/cm <sup>3</sup> ) <sup>2</sup> | Calc. <2mm bulk density (g/cm <sup>3</sup> ) <sup>3</sup> | CaCO <sub>3</sub> % | Soluble salt % | Gypsum % | Estimated field gravel (vol. %) | Laboratory gravel (wt. %) | Sand % | Silt % | Clay % |
|----------------|------------|------------|-------------------------------------------------------|----------------------------------------------------|-----------------------------------------------------------|---------------------|----------------|----------|---------------------------------|---------------------------|--------|--------|--------|
| CM01-01        |            |            |                                                       |                                                    |                                                           |                     |                |          |                                 |                           |        |        |        |
| Av             | 0-12       | 12         | N.D.                                                  | 1.63                                               | 1.54                                                      | 16.7                | 0.69           | 0.008    | 20                              | 21                        | 49.2   | 35.7   | 15.1   |
| Bwkz           | 12-25      | 13         | 1.94                                                  | 1.79                                               | 1.39                                                      | 10.0                | 1.60           | 0.239    | 70                              | 78                        | 97.7   | 2.0    | 0.3    |
| 2Bk1           | 25-40      | 15         | 2.00                                                  | 1.57                                               | 1.13                                                      | 8.6                 | 1.14           | 0.246    | 70                              | 75                        | 98.7   | 1.2    | 0.1    |
| 2Bk2           | 40-75      | 35         | 2.20                                                  | 1.57 e                                             | 1.13                                                      | 9.7                 | 0.72           | 0.016    | 90                              | 70                        | 98.3   | 1.5    | 0.2    |
| 2Bk3           | 75-122     | 47         | N.D.                                                  | 1.57 e                                             | 1.13                                                      | 11.1                | 0.33           | 0.006    | 60                              | 71                        | 99.4   | 0.5    | 0.1    |
| 3C             | 122-150    | 28         | N.D.                                                  | 1.36                                               | 1.40                                                      | 7.0                 | 0.41           | 0.004    | 25                              | 36                        | 99.0   | 0.7    | 0.3    |
| 4C             | 150-218    | 68         | 1.86                                                  | 1.86                                               | 1.40                                                      | 8.8                 | 0.02           | 0.003    | 55                              | 80                        | 98.5   | 1.1    | 0.3    |
| 5Btkb          | 218-233    | 15         | N.D.                                                  | 1.57                                               | N.D.                                                      | 12.5                | 0.54           | 0.007    | 50                              | 60                        | 97.4   | 2.2    | 0.5    |
| 5Bwkb          | 233-280+   | 47+        | N.D.                                                  | 1.57 e                                             | N.D.                                                      | 17.5                | 0.41           | 0.008    | 80                              | 90                        | 95.6   | 3.9    | 0.5    |
| CM01-02        |            |            |                                                       |                                                    |                                                           |                     |                |          |                                 |                           |        |        |        |
| Av             | 0-9        | 9          | N.D.                                                  | 1.60                                               | 1.49                                                      | 6.1                 | 4.27           | 0.042    | 20                              | 15                        | 58.0   | 32.8   | 9.2    |
| Btk1           | 9-16       | 7          | N.D.                                                  | 1.39                                               | 1.17                                                      | 4.0                 | 1.57           | 0.017    | 40                              | 45                        | 61.3   | 29.4   | 9.3    |
| Btk2           | 16-43      | 27         | 2.32                                                  | 1.74                                               | 1.14                                                      | 3.4                 | 1.37           | 0.009    | 50                              | 55                        | 63.8   | 32.1   | 4.1    |
| Bwk            | 43-60      | 17         | N.D.                                                  | 1.88                                               | 1.41                                                      | 4.1                 | 0.90           | 0.017    | 60                              | 53                        | 94.2   | 5.1    | 0.8    |
| Bk1            | 60-89      | 29         | N.D.                                                  | 1.88 e                                             | 1.44                                                      | 2.0                 | 0.55           | 0.010    | 70                              | 71                        | 98.6   | 0.8    | 0.6    |
| Bk2            | 89-125     | 36         | 2.25                                                  | 2.16                                               | 1.44                                                      | 4.2                 | 0.03           | 0.008    | 70                              | 63                        | 99.1   | 0.6    | 0.3    |
| 2C             | 125-220+   | 95+        | 2.03                                                  | 2.15                                               | 1.44                                                      | 1.7                 | 0.05           | 0.002    | 75                              | 76                        | 99.6   | 0.2    | 0.2    |
| CM01-03        |            |            |                                                       |                                                    |                                                           |                     |                |          |                                 |                           |        |        |        |
| Av             | 0-10       | 10         | N.D.                                                  | 1.37                                               | 1.35                                                      | 6.1                 | 1.30           | 0.042    | 15                              | 24                        | 63.1   | 27.5   | 9.4    |
| Bwkz           | 10-26      | 16         | N.D.                                                  | 1.50 e                                             | 1.20                                                      | 6.3                 | 3.01           | 0.607    | 75                              | 66                        | 83.5   | 14.9   | 1.6    |
| Bkz1           | 26-43      | 17         | N.D.                                                  | 1.80 e                                             | 1.10                                                      | 3.7                 | 1.46           | 0.014    | 60                              | 59                        | 95.9   | 3.4    | 0.7    |
| Bk2            | 43-85      | 42         | 2.03                                                  | 2.03                                               | 1.40                                                      | 2.5                 | 1.59           | 0.015    | 70                              | 55                        | 95.6   | 3.2    | 1.3    |
| Bk3            | 85-123     | 38         | N.D.                                                  | 2.03 e                                             | 1.40                                                      | 1.8                 | 1.45           | 0.020    | 70                              | 54                        | 95.2   | 4.0    | 0.8    |
| 2Bk4           | 123-210    | 87         | N.D.                                                  | 2.03 e                                             | 1.40                                                      | 1.8                 | 0.32           | 0.004    | 85                              | 60                        | 97.7   | 2.3    | 0.1    |
| 3C -R-         | 210-230+   | 20+        | N.D.                                                  | 1.36                                               | 1.36                                                      | N.D.                | N.D.           | N.D.     | 0                               | N.D.                      | N.D.   | N.D.   | N.D.   |

\* See Redwine (2003) for Newark Valley soil data.

<sup>1</sup> Bulk density measured by excavating and weighing a measured volume of sediment; measured sample intervals do not necessarily match horizon boundaries.

<sup>2</sup> Bulk density measured in the laboratory by the paraffin-clod method (described in Singer and Janitzky, 1986).

<sup>3</sup> Bulk density of <2mm fraction was calculated by subtracting the mass of gravel (weight percent of total sample times bulk density of rock, assumed to be 2.65 g/cm<sup>3</sup>) from total mass.

<sup>4</sup> Bulk density was estimated by comparison to measurements on similar horizons (similar gravel percent, clast size, lithology, sorting, soil development, etc).

<sup>5</sup> In horizon name, "t" at depths below ~50 cm denotes clay coats on clasts in strata consisting of open-work gravels with little matrix

Table DR2. Soil profile bulk density measurements used in  $^{36}\text{Cl}$  modeling (table DR3). Depth increments correspond to soil horizons. Where both ped and excavation methods were used to obtain bulk density data for the same horizon (see table DR1), generally the ped data are shown here unless peds were considered unrepresentative of the entire horizon. Horizons with no bulk density measurement were considered homogeneous with measured horizon above, or were estimated by comparison with horizons having similar gravel content (denoted by "e"). All bulk density values for profile TB02-00 were estimated (table DR3).

| TB00-01       |                                       | TB00-02       |                                       | TB00-03       |                                       | TB00-04       |                                       |
|---------------|---------------------------------------|---------------|---------------------------------------|---------------|---------------------------------------|---------------|---------------------------------------|
| Depth<br>(cm) | Bulk Density<br>(g cm <sup>-3</sup> ) |
| 0-7           | 1.29                                  | 0-11          | 1.60                                  | 0-8           | 1.59                                  | 0-7           | 1.68                                  |
| 7-20          | 1.56                                  | 11-30         | 1.43                                  | 8-19          | 1.42                                  | 7-15          | 1.74                                  |
| 20-32         | 2.20                                  | 30-85         | 1.69                                  | 19-30         | 1.43                                  | 15-31         | 1.74e                                 |
| 32-51         | 2.20                                  | 85-125        | 1.89                                  | 30-48         | 1.43e                                 | 31-49         | 1.74e                                 |
| 51-78         | 1.74                                  | 125-156       | 2.07                                  | 48-60         | 1.63                                  | 49-67         | 1.74e                                 |
| 78-114        | 2.05                                  | 156-200+      | 2.25                                  | 60-162        | 1.79                                  | 67-108        | 1.53                                  |
| 114-200+      | 2.01                                  |               |                                       | 162-210+      | 2.15                                  | 108-151       | 1.70                                  |
|               |                                       |               |                                       |               |                                       | 151-230+      | 2.19                                  |

| CM01-01       |                                       | CM01-02       |                                       | CM01-03       |                                       | NV00-02       |                                       |
|---------------|---------------------------------------|---------------|---------------------------------------|---------------|---------------------------------------|---------------|---------------------------------------|
| Depth<br>(cm) | Bulk Density<br>(g cm <sup>-3</sup> ) |
| 0-12          | 1.63                                  | 0-9           | 1.60                                  | 0-10          | 1.37                                  | 0-8           | 1.92                                  |
| 12-25         | 1.79                                  | 9-16          | 1.39                                  | 10-26         | 1.50e                                 | 8-25          | 1.64                                  |
| 25-40         | 1.57                                  | 16-43         | 1.74                                  | 26-43         | 1.80e                                 | 25-33         | 1.64e                                 |
| 40-75         | 1.57e                                 | 43-60         | 1.88                                  | 43-85         | 2.03e                                 | 33-50         | 2.08                                  |
| 75-122        | 1.57e                                 | 60-89         | 1.88e                                 | 85-123        | 2.03e                                 | 50-150+       | 2.00e                                 |
| 122-150       | 1.36                                  | 89-125        | 2.16                                  | 123-210       | 2.03e                                 |               |                                       |
| 150-218       | 1.86                                  | 125-220       | 2.15                                  | 210-230       | 1.36                                  |               |                                       |
| 218-233       | 1.57                                  |               |                                       |               |                                       |               |                                       |
| 233-280+      | 1.57e                                 |               |                                       |               |                                       |               |                                       |

| NV00-01       |                                       | P00-01        |                                       | P00-02        |                                       | P00-03        |                                       |
|---------------|---------------------------------------|---------------|---------------------------------------|---------------|---------------------------------------|---------------|---------------------------------------|
| Depth<br>(cm) | Bulk Density<br>(g cm <sup>-3</sup> ) |
| 0-9           | 1.54                                  | 0-15          | 1.54                                  | 0-12          | 1.49                                  | 0-13          | 1.44                                  |
| 9-19          | 1.97                                  | 15-48         | 1.42                                  | 12-29         | 1.55                                  | 13-30         | 1.34                                  |
| 19-26         | 1.71                                  | 48-94         | 1.91                                  | 29-59         | 1.71                                  | 30-51         | 1.48                                  |
| 26-43         | 1.71                                  | 94-117        | 1.86                                  | 59-88         | 1.85                                  | 51-67         | 1.77                                  |
| 43-92         | 1.91                                  | 117-230+      | 1.86                                  | 88-192        | 1.80e                                 | 67-95         | 1.51                                  |
| 92-155        | 1.90                                  |               |                                       | 192-238       | 1.37                                  | 95-156        | 1.45, 1.71*                           |
| 155-158       | 1.85                                  |               |                                       | 238-263+      | 1.80e                                 | 156-185       | 1.46e                                 |
| 158-162       | 1.50e                                 |               |                                       |               |                                       | 185-230+      | 1.46                                  |
| 162-163       | 1.50e                                 |               |                                       |               |                                       |               |                                       |
| 163-190+      | 1.45e                                 |               |                                       |               |                                       |               |                                       |

Table DR3. Calculations of eolian additions and surface inflation for trench soil profiles [N.D., not determined; N.A., not available]

| Profile no.                                                    | Trench<br>altitude (m) | Eolian additions to profiles (g/cm <sup>2</sup> /soil column) |      |      |                   |       |       | Eolian adds. to solum<br>(g/cm <sup>2</sup> /soil column) <sup>1</sup> | Inflation<br>(mm) <sup>2</sup> | Independent<br>age control (ka) <sup>3</sup> | Inflation<br>(mm/kyr) |
|----------------------------------------------------------------|------------------------|---------------------------------------------------------------|------|------|-------------------|-------|-------|------------------------------------------------------------------------|--------------------------------|----------------------------------------------|-----------------------|
|                                                                |                        | Sand                                                          | Silt | Clay | CaCO <sub>3</sub> | Salts | Total |                                                                        |                                |                                              |                       |
| Thorne Bar, Walker Lake subbasin of Lake Lahontan <sup>4</sup> |                        |                                                               |      |      |                   |       |       |                                                                        |                                |                                              |                       |
| TB02-00                                                        | 1325                   | N.D.                                                          | N.D. | N.D. | N.D.              | N.D.  | N.D.  | N.D.                                                                   | N.D.                           | N.D.                                         | N.D.                  |
| TB00-01                                                        | 1333                   | 6.3                                                           | 11.1 | 2.2  | 1.3               | 0.3   | 21.2  | 9.6                                                                    | 64                             | 15.2 (cal <sup>14</sup> C) <sup>5</sup>      | 4.23                  |
| TB00-02                                                        | 1351                   | 8.6                                                           | 20.0 | 3.3  | 3.8               | 0.4   | 36.0  | 12.0                                                                   | 80                             | 128 (U-series)                               | 0.62                  |
| TB00-03                                                        | 1357                   | 18.0                                                          | 19.6 | 4.8  | 2.5               | 0.2   | 45.1  | 26.5                                                                   | 177                            | 190 (U-series)                               | 0.93                  |
| TB00-04                                                        | 1399                   | 2.7                                                           | 18.1 | 6.0  | 3.6               | 1.1   | 31.5  | 12.0                                                                   | 80                             | <760 (tephra)                                | 0.10                  |
| Columbus Salt Marsh, Lake Columbus <sup>4</sup>                |                        |                                                               |      |      |                   |       |       |                                                                        |                                |                                              |                       |
| CM01-01                                                        | 1392                   | 6.0                                                           | 4.4  | 2.0  | 3.3               | 0.5   | 16.2  | 14.7                                                                   | 98                             | 17.8 (cal <sup>14</sup> C)                   | 5.51                  |
| CM01-02                                                        | 1413                   | 18.9                                                          | 9.4  | 2.1  | 2.3               | 0.9   | 33.7  | 29.5                                                                   | 197                            | N.A.                                         | N.D.                  |
| CM01-03                                                        | 1423                   | 11.0                                                          | 6.1  | 1.5  | 2.1               | 1.3   | 22.0  | 16.7                                                                   | 111                            | 148 (U-series)                               | 0.75                  |
| Newark Valley, Lake Newark <sup>6</sup>                        |                        |                                                               |      |      |                   |       |       |                                                                        |                                |                                              |                       |
| NV00-02 (N5)                                                   | 1846                   | 18.1                                                          | 16.5 | 6.6  | 10.8              | N.P.  | 51.9  | 38.6                                                                   | 258                            | 16.2 (cal <sup>14</sup> C)                   | 15.90                 |
| NV00-01 (N1)                                                   | 1856                   | 20.4                                                          | 38.0 | 15.3 | 53.1              | N.P.  | 126.9 | 116.5                                                                  | 777                            | 130 (AAR) <sup>7</sup>                       | 5.98                  |
| P00-01 (P1)                                                    | 1849                   | 55.7                                                          | 15.7 | 16.8 | 17.9              | N.P.  | 106.2 | 93.3                                                                   | 622                            | 130                                          | 4.79                  |
| P00-02 (P2)                                                    | 1854                   | 41.0                                                          | 14.3 | 11.0 | 41.8              | N.P.  | 108.1 | 90.3                                                                   | 602                            | 130                                          | 4.63                  |
| P00-03 (P3)                                                    | 1863                   | 14.1                                                          | 27.8 | 17.3 | 34.5              | N.P.  | 93.6  | 55.6                                                                   | 370                            | N.A.                                         | N.D.                  |

<sup>1</sup> Solum generally consists of Av, Bw, Bwk, and (or) Bt and Btk horizons; see table DR1 for Thorne and Columbus soils, Redwine (2003) for Newark soils

<sup>2</sup> Calculation assumes that bulk density = 1.5 g/cm<sup>3</sup> for the <2mm fraction that composes eolian additions

<sup>3</sup> Independent age control derived from data in tables 3 and 4 in text, except as noted in footnotes 5 and 7

<sup>4</sup> Soil laboratory data are in Table DR1

<sup>5</sup> Calibrated radiocarbon age for Thorne bar is that of Lake Lahontan highstand (using <sup>14</sup>C age of Adams and Wesnousky, 1998)

<sup>6</sup> Soil profile descriptions and laboratory data in Redwine (2003)

<sup>7</sup> AAR is amino-acid racemization age estimate reported in Redwine (2003)

Table DR4. Field and analytical data for  $^{36}\text{Cl}$  samples.

| Sample Number                  |                                                  |                                                      | TB02-00-25 | TB02-00-40 | TB02-00-60 | TB02-00-100 | TB02-00-152 | TB00-01-40 | TB00-01-50 | TB00-01-75 | TB00-01-110 | TB00-01-140 | TB00-01-160 | TB00-01-220 |
|--------------------------------|--------------------------------------------------|------------------------------------------------------|------------|------------|------------|-------------|-------------|------------|------------|------------|-------------|-------------|-------------|-------------|
| Depth                          | sample depth interval                            | (cm)                                                 | 20-30      | 35-45      | 55-65      | 95-105      | 147-157     | 30-40      | 50-60      | 75-85      | 110-120     | 140-150     | 160-170     | 220-240     |
| Depth                          | mass depth                                       | (g cm <sup>-2</sup> )                                | 33.8       | 54.0       | 81.0       | 135.0       | 205.2       | 62.3       | 104.5      | 148.6      | 220.3       | 280.6       | 320.8       | 451.4       |
| R <sub>36</sub>                | sample $^{36}\text{Cl}/\text{Cl}$ ratio          | ( $^{36}\text{Cl}/10^{15}\text{Cl}$ )                | 1226       | 1241       | 1253       | 1150        | 1150        | 1608       | 1498       | 1300       | 1024        | 1167        | 959         | 949         |
| ±R <sub>36</sub>               | sample $^{36}\text{Cl}/\text{Cl}$ 1σ uncertainty | ( $^{36}\text{Cl}/10^{15}\text{Cl}$ )                | 22         | 23         | 51         | 27          | 38          | 63         | 154        | 66         | 54          | 40          | 23          | 44          |
| ρ <sub>b</sub>                 | bulk density                                     | (g cm <sup>-3</sup> )                                | 1.87       | 1.87       | 1.87       | 1.87        | 1.87        | 2.20       | 1.74       | 2.05       | 2.05        | 2.01        | 2.01        | 2.01        |
| l <sub>s</sub>                 | sample thickness                                 | (cm)                                                 | 10         | 10         | 10         | 10          | 10          | 10         | 10         | 10         | 10          | 10          | 10          | 20          |
| θ <sub>avg</sub>               | water content                                    | (cm <sup>3</sup> /cm <sup>3</sup> )                  | 0.05       | 0.05       | 0.05       | 0.05        | 0.05        | 0.05       | 0.05       | 0.05       | 0.05        | 0.05        | 0.05        | 0.05        |
| Elev                           |                                                  | (m)                                                  | 1325       | 1325       | 1325       | 1325        | 1325        | 1333       | 1333       | 1333       | 1333        | 1333        | 1333        | 1333        |
| lat                            | degrees                                          |                                                      | 38.66      | 38.66      | 38.66      | 38.66       | 38.66       | 381.670    | 381.671    | 381.672    | 381.673     | 381.674     | 381.675     | 381.676     |
| long                           | degrees                                          |                                                      | -118.65    | -118.65    | -118.65    | -118.65     | -118.65     | -118.642   | -118.642   | -118.642   | -118.642    | -118.642    | -118.642    | -118.642    |
| S <sub>snow</sub>              | snow shielding                                   | (unitless)                                           | 1.0        | 1.0        | 1.0        | 1.0         | 1.0         | 1.0        | 1.0        | 1.0        | 1.0         | 1.0         | 1.0         | 1.0         |
| S <sub>T</sub>                 | total shielding                                  | (unitless)                                           | 1.0        | 1.0        | 1.0        | 1.0         | 1.0         | 1.0        | 1.0        | 1.0        | 1.0         | 1.0         | 1.0         | 1.0         |
| Λ <sub>f</sub>                 | effective atten. length                          | (g cm <sup>-2</sup> )                                | 170        | 170        | 170        | 170         | 170         | 170        | 170        | 170        | 170         | 170         | 170         | 170         |
| LOI                            | loss on ignition                                 | (wt %)                                               | 0          | 0          | 0          | 0           | 0           | 0          | 0          | 0          | 0           | 0           | 0           | 0           |
| Na <sub>2</sub> O              |                                                  | (wt %)                                               | 4.35       | 4.52       | 4.44       | 4.37        | 4.5         | 4.53       | 4.59       | 4.46       | 4.49        | 4.43        | 4.54        | 4.46        |
| MgO                            |                                                  | (wt %)                                               | 0.86       | 0.87       | 0.86       | 0.82        | 0.85        | 0.92       | 0.81       | 0.97       | 1.04        | 0.88        | 0.94        | 0.89        |
| Al <sub>2</sub> O <sub>3</sub> |                                                  | (wt %)                                               | 15.32      | 15.47      | 15.35      | 15.31       | 15.46       | 15.42      | 15.28      | 15.59      | 15.63       | 15.32       | 15.45       | 15.43       |
| SiO <sub>2</sub>               |                                                  | (wt %)                                               | 69.42      | 69.77      | 69.83      | 69.975      | 69.75       | 70.02      | 70.65      | 68.96      | 69.18       | 70.63       | 69.58       | 69.52       |
| P <sub>2</sub> O <sub>5</sub>  |                                                  | (wt %)                                               | 0.05       | 0.05       | 0.04       | 0.04        | 0.05        | 0.05       | 0.04       | 0.05       | 0.06        | 0.04        | 0.04        | 0.04        |
| K <sub>2</sub> O               |                                                  | (wt %)                                               | 3.24       | 3.32       | 3.32       | 3.45        | 3.38        | 3.54       | 3.75       | 3.27       | 3.11        | 3.62        | 3.51        | 3.36        |
| CaO                            |                                                  | (wt %)                                               | 1.99       | 1.91       | 1.99       | 1.75        | 1.88        | 1.81       | 1.57       | 2.14       | 2.22        | 1.75        | 1.89        | 1.96        |
| TiO <sub>2</sub>               |                                                  | (wt %)                                               | 0.36       | 0.37       | 0.35       | 0.36        | 0.38        | 0.36       | 0.33       | 0.4        | 0.4         | 0.35        | 0.36        | 0.36        |
| MnO                            |                                                  | (wt %)                                               | 0.06       | 0.06       | 0.06       | 0.06        | 0.06        | 0.06       | 0.06       | 0.6        | 0.06        | 0.06        | 0.06        | 0.06        |
| Fe <sub>2</sub> O <sub>3</sub> |                                                  | (wt %)                                               | 3.03       | 3          | 2.91       | 2.79        | 3.01        | 2.94       | 2.72       | 3.12       | 3.24        | 2.79        | 3           | 3           |
| Cl                             |                                                  | (ppm)                                                | 107.35     | 110.75     | 104.19     | 99.98       | 105.87      | 124.46     | 153.7      | 121.67     | 126.24      | 114.01      | 131.29      | 113.89      |
| B                              | (may be estimated)                               | (ppm)                                                | 10         | 10         | 9          | 8           | 5           | 8          | 6          | 8          | 8           | 8           | 6           | 9           |
| Sm                             | (estimated)                                      | (ppm)                                                | 12         | 12         | 12         | 12          | 12          | 12         | 12         | 12         | 12          | 12          | 12          | 12          |
| Gd                             | (may be estimated)                               | (ppm)                                                | 2          | 2          | 2          | 3           | 2           | 3          | 3          | 3          | 4           | 2           | 3           | 2           |
| U                              | (may be estimated)                               | (ppm)                                                | 4          | 3          | 3          | 3           | 3           | 4          | 3          | 3          | 3           | 4           | 2           | 4           |
| Th                             | (may be estimated)                               | (ppm)                                                | 12         | 11         | 11         | 10          | 10          | 13         | 6          | 4          | 4           | 12          | 6           | 13          |
| M <sub>sample</sub>            | sample mass                                      | (g)                                                  | 50.3835    | 50.1566    | 60.6902    | 50.6777     | 50.4016     | 60.0095    | 50.044     | 60.009     | 61.9977     | 50.2808     | 70.1738     | 60.0039     |
| M <sub>spike</sub>             | mass $^{35}\text{Cl}$ spike solution             | (g)                                                  | 3.0101     | 3.0228     | 4.004      | 3.0203      | 3.0092      | 4.0091     | 4.027      | 4.044      | 4.023       | 4.0256      | 4.0593      | 4.018       |
| C <sub>spike</sub>             | conc. spike solution                             | (g g <sup>-1</sup> )                                 | 0.998      | 0.998      | 0.998      | 0.998       | 0.998       | 0.998      | 0.995      | 0.998      | 0.998       | 0.995       | 0.998       | 0.998       |
| S/S                            | analytical stable isotope ratio                  | ( $^{35}\text{Cl}/(^{35}\text{Cl}+^{37}\text{Cl})$ ) | 5.39       | 5.34       | 5.7        | 5.55        | 5.42        | 5.31       | 5.25       | 5.298      | 5.296       | 5.97        | 4.92        | 5.517       |
| ±S/S                           | anal. st. isotope ratio unc.                     | ( $^{35}\text{Cl}/(^{35}\text{Cl}+^{37}\text{Cl})$ ) | 0.05       | 0.05       | 0.05       | 0.05        | 0.05        | 0.043      | 0.16       | 0.037      | 0.045       | 0.2         | 0.057       | 0.06        |
| R/S                            | analytical $^{36}\text{Cl}/\text{Cl}$ ratio      | $^{36}\text{Cl}/10^{15}\text{Cl}$                    | 785        | 800        | 763        | 748         | 732         | 1042       | 980        | 844        | 665         | 683         | 663         | 595         |
| ±R/S                           | analytical $^{36}\text{Cl}/\text{Cl}$ ratio unc. | $^{36}\text{Cl}/10^{15}\text{Cl}$                    | 14         | 14         | 31         | 17          | 23          | 40         | 100        | 42         | 35          | 22          | 16          | 27          |

Table DR4. Field and analytical data for  $^{36}\text{Cl}$  samples.

| Sample Number                  |                                                  |                                                      | TB00-02-30 | TB00-02-50 | TB00-02-75 | TB00-02-100 | TB00-02-135 | TB00-02-165 | TB00-02-240 | TB00-03-30 | TB00-03-60 | TB00-03-95 | TB00-03-120 | TB00-03-190 |
|--------------------------------|--------------------------------------------------|------------------------------------------------------|------------|------------|------------|-------------|-------------|-------------|-------------|------------|------------|------------|-------------|-------------|
| Depth                          | sample depth interval                            | (cm)                                                 | 30-45      | 50-65      | 75-90      | 100-120     | 135-150     | 165-180     | 235-245     | 30-40      | 60-70      | 95-105     | 120-130     | 190-205     |
| Depth                          | mass depth                                       | (g cm <sup>-2</sup> )                                | 56.6       | 90.4       | 136.0      | 186.9       | 246.3       | 317.6       | 468.4       | 51.2       | 98.3       | 161.0      | 205.7       | 347.2       |
| R <sub>36</sub>                | sample $^{36}\text{Cl}/\text{Cl}$ ratio          | ( $^{36}\text{Cl}/10^{15}\text{Cl}$ )                | 3500       | 2349       | 1892       | 1288        | 1004        | 1351        | 720         | 3247       | 2581       | 2087       | 1430        | 1201        |
| ±R <sub>36</sub>               | sample $^{36}\text{Cl}/\text{Cl}$ 1σ uncertainty | ( $^{36}\text{Cl}/10^{15}\text{Cl}$ )                | 81         | 117        | 62         | 95          | 41          | 50          | 15          | 169        | 90         | 83         | 66          | 37          |
| ρ <sub>b</sub>                 | bulk density                                     | (g cm <sup>-3</sup> )                                | 1.69       | 1.69       | 1.89       | 1.89        | 2.07        | 2.25        | 2.25        | 1.43       | 1.79       | 1.79       | 1.79        | 2.15        |
| l <sub>s</sub>                 | sample thickness                                 | (cm)                                                 | 15         | 15         | 15         | 20          | 15          | 15          | 10          | 10         | 10         | 10         | 10          | 15          |
| θ <sub>avg</sub>               | water content                                    | (cm <sup>3</sup> /cm <sup>3</sup> )                  | 0.05       | 0.05       | 0.05       | 0.05        | 0.05        | 0.05        | 0.05        | 0.05       | 0.05       | 0.05       | 0.05        | 0.05        |
| Elev                           |                                                  | (m)                                                  | 1351       | 1351       | 1351       | 1351        | 1351        | 1351        | 1351        | 1357       | 1357       | 1357       | 1357        | 1357        |
| lat                            | degrees                                          |                                                      | 38.669     | 38.669     | 38.669     | 38.669      | 38.669      | 38.669      | 38.669      | 38.668     | 38.668     | 38.668     | 38.668      | 38.668      |
| long                           | degrees                                          |                                                      | -118.642   | -118.642   | -118.642   | -118.642    | -118.642    | -118.642    | -118.642    | -118.639   | -118.639   | -118.639   | -118.639    | -118.639    |
| S <sub>snow</sub>              | snow shielding                                   | (unitless)                                           | 1.0        | 1.0        | 1.0        | 1.0         | 1.0         | 1.0         | 1.0         | 1.0        | 1.0        | 1.0        | 1.0         | 1.0         |
| S <sub>T</sub>                 | total shielding                                  | (unitless)                                           | 1.0        | 1.0        | 1.0        | 1.0         | 1.0         | 1.0         | 1.0         | 1.0        | 1.0        | 1.0        | 1.0         | 1.0         |
| Λ <sub>f</sub>                 | effective atten. length                          | (g cm <sup>-2</sup> )                                | 170        | 170        | 170        | 170         | 170         | 170         | 170         | 170        | 170        | 170        | 170         | 170         |
| LOI                            | loss on ignition                                 | (wt %)                                               | 0          | 0          | 0          | 0           | 0           | 0           | 0           | 0          | 0          | 0          | 0           | 0           |
| Na <sub>2</sub> O              |                                                  | (wt %)                                               | 4.09       | 4.05       | 4.18       | 4.19        | 3.42        | 4.4         | 4.2         | 5.49       | 6.00       | 4.07       | 5.28        | 5.27        |
| MgO                            |                                                  | (wt %)                                               | 1.39       | 1.47       | 1.27       | 1.29        | 0.96        | 1.15        | 1.16        | 1.66       | 1.40       | 1.21       | 1.84        | 1.57        |
| Al <sub>2</sub> O <sub>3</sub> |                                                  | (wt %)                                               | 16.29      | 16.55      | 16.1       | 16.17       | 15.52       | 16.18       | 16.14       | 17.64      | 17.46      | 16.97      | 17.31       | 16.37       |
| SiO <sub>2</sub>               |                                                  | (wt %)                                               | 65.91      | 65.29      | 67.29      | 66.94       | 67.73       | 67.35       | 66.36       | 54.47      | 58.92      | 58.90      | 56.68       | 60.38       |
| P <sub>2</sub> O <sub>5</sub>  |                                                  | (wt %)                                               | 0.06       | 0.07       | 0.06       | 0.08        | 0.05        | 0.05        | 0.05        | 0.14       | 0.03       | 0.42       | 0.18        | 0.10        |
| K <sub>2</sub> O               |                                                  | (wt %)                                               | 3.03       | 3.1        | 3.12       | 3.18        | 4.97        | 3.17        | 3.12        | 6.01       | 6.89       | 5.63       | 6.24        | 6.71        |
| CaO                            |                                                  | (wt %)                                               | 3.36       | 3.58       | 3.1        | 3.36        | 2.79        | 3.14        | 3.1         | 4.82       | 2.43       | 5.61       | 4.50        | 2.72        |
| TiO <sub>2</sub>               |                                                  | (wt %)                                               | 0.54       | 0.61       | 0.54       | 0.52        | 0.69        | 0.49        | 0.5         | 1.44       | 0.68       | 1.03       | 0.78        | 0.75        |
| MnO                            |                                                  | (wt %)                                               | 0.08       | 0.08       | 0.08       | 0.07        | 0.07        | 0.07        | 0.07        | 0.19       | 0.08       | 0.12       | 0.17        | 0.13        |
| Fe <sub>2</sub> O <sub>3</sub> |                                                  | (wt %)                                               | 4.44       | 4.64       | 4.07       | 3.98        | 3.79        | 3.76        | 3.86        | 7.53       | 5.94       | 6.01       | 7.02        | 6.01        |
| Cl                             |                                                  | (ppm)                                                | 87.23      | 90.7       | 109.67     | 112.26      | 91.71       | 86.03       | 92.58       | 109.24     | 114.46     | 114.73     | 133.42      | 115.03      |
| B                              | (may be estimated)                               | (ppm)                                                | 11         | 13         | 12         | 11          | 9           | 9           | 11          | 7          | 8          | 53         | 10          | 8           |
| Sm                             | (estimated)                                      | (ppm)                                                | 12         | 12         | 12         | 12          | 12          | 12          | 12          | 12         | 12         | 12         | 12          | 12          |
| Gd                             | (may be estimated)                               | (ppm)                                                | 3          | 5          | 3          | 2           | 3           | 3           | 3           | 3          | 4          | 1          | 3           | 3           |
| U                              | (may be estimated)                               | (ppm)                                                | 3          | 4          | 3          | 2           | 2           | 2.5         | 2           | 3          | 3          | 3          | 3           | 3           |
| Th                             | (may be estimated)                               | (ppm)                                                | 11         | 12         | 6          | 12          | 6           | 4           | 6           | 12         | 4          | 12         | 12          | 4           |
| M <sub>sample</sub>            | sample mass                                      | (g)                                                  | 50.6167    | 50.2506    | 50.1877    | 50.9189     | 71.6889     | 71.2182     | 60.2429     | 70.863     | 60.1991    | 60.008     | 60.008      | 71.185      |
| M <sub>spike</sub>             | mass $^{35}\text{Cl}$ spike solution             | (g)                                                  | 3.9934     | 3.008      | 3.0315     | 4.0143      | 4.0199      | 3.9982      | 4.0001      | 4.0082     | 4.0173     | 4.019      | 4.0209      | 5.018       |
| C <sub>spike</sub>             | conc. spike solution                             | (g g <sup>-1</sup> )                                 | 0.995      | 0.995      | 0.995      | 0.995       | 0.998       | 0.995       | 0.995       | 0.998      | 0.995      | 0.998      | 0.998       | 0.995       |
| S/S                            | analytical stable isotope ratio                  | ( $^{35}\text{Cl}/(^{35}\text{Cl}+^{37}\text{Cl})$ ) | 6.78       | 5.8        | 5.36       | 5.97        | 5.612       | 5.77        | 6.03        | 5.233      | 5.49       | 5.5        | 5.17        | 5.61        |
| ±S/S                           | anal. st. isotope ratio unc.                     | ( $^{35}\text{Cl}/(^{35}\text{Cl}+^{37}\text{Cl})$ ) | 0.15       | 0.32       | 0.55       | 0.1         | 0.021       | 0.24        | 0.06        | 0.027      | 0.08       | 0.08       | 0.09        | 0.07        |
| R/S                            | analytical $^{36}\text{Cl}/\text{Cl}$ ratio      | $^{36}\text{Cl}/10^{15}\text{Cl}$                    | 1830       | 1410       | 1216       | 754         | 620         | 554         | 418         | 2130       | 1625       | 1312       | 948         | 742         |
| ±R/S                           | analytical $^{36}\text{Cl}/\text{Cl}$ ratio unc. | $^{36}\text{Cl}/10^{15}\text{Cl}$                    | 42         | 70         | 40         | 54          | 25          | 20          | 12          | 110        | 57         | 53         | 44          | 23          |



Table DR4. Field and analytical data for  $^{36}\text{Cl}$  samples.

| Sample Number                  |                                                  |                                                      | TB00-03-240 | TB00-04-10 | TB00-04-40 | TB00-04-70 | TB00-04-140 | TB00-04-165 | TB00-04-190 | TB00-04-240 | CM01-01-15 | CM01-01-45 | CM01-01-90 | CM01-01-150 |
|--------------------------------|--------------------------------------------------|------------------------------------------------------|-------------|------------|------------|------------|-------------|-------------|-------------|-------------|------------|------------|------------|-------------|
| Depth                          | sample depth interval                            | (cm)                                                 | 240-260     | 10-15      | 40-50      | 70-80      | 140-150     | 165-175     | 190-200     | 240-260     | 15-25      | 45-55      | 90-100     | 150-160     |
| Depth                          | mass depth                                       | (g cm <sup>-2</sup> )                                | 461.1       | 21.3       | 77.9       | 130.1      | 241.8       | 293.6       | 348.4       | 468.8       | 33.9       | 82.1       | 152.7      | 240.0       |
| R <sub>36</sub>                | sample $^{36}\text{Cl}/\text{Cl}$ ratio          | ( $^{36}\text{Cl}/10^{15}\text{Cl}$ )                | 791         | 1608       | 1081       | 899        | 526         | 558         | 528         | 415         | 1020       | 830        | 936        | 1293        |
| ±R <sub>36</sub>               | sample $^{36}\text{Cl}/\text{Cl}$ 1σ uncertainty | ( $^{36}\text{Cl}/10^{15}\text{Cl}$ )                | 28          | 85         | 28         | 35         | 41          | 84          | 20          | 11          | 38         | 27         | 23         | 31          |
| ρ <sub>b</sub>                 | bulk density                                     | (g cm <sup>-3</sup> )                                | 2.15        | 1.74       | 1.74       | 1.53       | 1.70        | 2.19        | 2.19        | 2.19        | 1.79       | 1.57       | 1.57       | 1.36        |
| l <sub>s</sub>                 | sample thickness                                 | (cm)                                                 | 20          | 10         | 10         | 10         | 10          | 10          | 10          | 20          | 10         | 10         | 10         | 10          |
| θ <sub>avg</sub>               | water content                                    | (cm <sup>3</sup> /cm <sup>3</sup> )                  | 0.05        | 0.05       | 0.05       | 0.05       | 0.05        | 0.05        | 0.05        | 0.05        | 0.05       | 0.05       | 0.05       | 0.05        |
| Elev                           |                                                  | (m)                                                  | 1357        | 1399       | 1399       | 1399       | 1399        | 1399        | 1399        | 1399        | 1392       | 1392       | 1392       | 1392        |
| lat                            | degrees                                          |                                                      | 38.668      | 38.676     | 38.676     | 38.676     | 38.676      | 38.676      | 38.676      | 38.676      | 38.139     | 38.139     | 38.139     | 38.139      |
| long                           | degrees                                          |                                                      | -118.639    | -118.629   | -118.629   | -118.629   | -118.629    | -118.629    | -118.629    | -118.629    | -117.961   | -117.961   | -117.961   | -117.961    |
| S <sub>snow</sub>              | snow shielding                                   | (unitless)                                           | 1.0         | 1.0        | 1.0        | 1.0        | 1.0         | 1.0         | 1.0         | 1.0         | 1.0        | 1.0        | 1.0        | 1.0         |
| S <sub>T</sub>                 | total shielding                                  | (unitless)                                           | 1.0         | 1.0        | 1.0        | 1.0        | 1.0         | 1.0         | 1.0         | 1.0         | 1.0        | 1.0        | 1.0        | 1.0         |
| Λ <sub>f</sub>                 | effective atten. length                          | (g cm <sup>-2</sup> )                                | 170         | 170        | 170        | 170        | 170         | 170         | 170         | 170         | 170        | 170        | 170        | 170         |
| LOI                            | loss on ignition                                 | (wt %)                                               | 0           | 0          | 0          | 0          | 0           | 0           | 0           | 0           | 0          | 0          | 0          | 0           |
| Na <sub>2</sub> O              |                                                  | (wt %)                                               | 5.29        | 5.50       | 4.43       | 4.06       | 4.31        | 4.20        | 4.17        | 4.44        | 0.69       | 0.81       | 0.93       | 0.66        |
| MgO                            |                                                  | (wt %)                                               | 1.66        | 1.68       | 1.07       | 1.13       | 1.23        | 1.31        | 1.26        | 1.08        | 0.73       | 0.97       | 1.12       | 0.72        |
| Al <sub>2</sub> O <sub>3</sub> |                                                  | (wt %)                                               | 16.00       | 16.71      | 15.79      | 15.67      | 15.89       | 16.08       | 15.95       | 15.69       | 6.31       | 7.33       | 8.41       | 6.01        |
| SiO <sub>2</sub>               |                                                  | (wt %)                                               | 60.47       | 58.70      | 68.63      | 68.52      | 67.59       | 66.77       | 67.66       | 68.81       | 85.05      | 82.35      | 79.75      | 84.73       |
| P <sub>2</sub> O <sub>5</sub>  |                                                  | (wt %)                                               | 0.12        | 0.13       | 0.07       | 0.09       | 0.08        | 0.07        | 0.09        | 0.07        | 0.05       | 0.08       | 0.08       | 0.06        |
| K <sub>2</sub> O               |                                                  | (wt %)                                               | 6.45        | 6.78       | 3.36       | 3.45       | 3.26        | 3.21        | 3.29        | 3.34        | 1.47       | 1.63       | 1.80       | 1.38        |
| CaO                            |                                                  | (wt %)                                               | 3.00        | 3.67       | 2.30       | 2.42       | 2.56        | 2.92        | 2.64        | 2.13        | 0.16       | 0.24       | 0.24       | 0.14        |
| TiO <sub>2</sub>               |                                                  | (wt %)                                               | 0.50        | 0.71       | 0.47       | 0.49       | 0.50        | 0.55        | 0.51        | 0.46        | 0.61       | 0.69       | 0.92       | 0.68        |
| MnO                            |                                                  | (wt %)                                               | 0.12        | 0.12       | 0.07       | 0.07       | 0.07        | 0.07        | 0.07        | 0.07        | 0.02       | 0.02       | 0.02       | 0.02        |
| Fe <sub>2</sub> O <sub>3</sub> |                                                  | (wt %)                                               | 6.34        | 5.96       | 3.65       | 3.64       | 3.91        | 4.20        | 3.95        | 3.59        | 3.10       | 3.67       | 4.39       | 3.39        |
| Cl                             |                                                  | (ppm)                                                | 115.07      | 105.47     | 136.40     | 131.35     | 116.68      | 136.45      | 110.49      | 117.19      | 29.10      | 45.14      | 41.58      | 24.05       |
| B                              | (may be estimated)                               | (ppm)                                                | 10          | 10         | 12         | 14         | 12          | 11          | 10          | 10          | 37         | 41         | 52         | 39          |
| Sm                             | (estimated)                                      | (ppm)                                                | 12          | 12         | 12         | 12         | 12          | 12          | 12          | 12          | 12         | 12         | 12         | 12          |
| Gd                             | (may be estimated)                               | (ppm)                                                | 3           | 4          | 4          | 3          | 3           | 3           | 3           | 3           | 2          | 2          | 2          | 2           |
| U                              | (may be estimated)                               | (ppm)                                                | 3           | 3.5        | 3.5        | 4          | 3           | 3           | 4           | 3           | 2          | 2          | 2          | 2           |
| Th                             | (may be estimated)                               | (ppm)                                                | 12          | 6          | 6          | 14         | 6           | 5           | 13          | 6           | 4          | 4          | 5          | 4           |
| M <sub>sample</sub>            | sample mass                                      | (g)                                                  | 70.153      | 61.0218    | 49.8123    | 50.8227    | 70.0947     | 59.9932     | 59.9051     | 59.9642     | 79.9423    | 60.0136    | 60.3085    | 126.188     |
| M <sub>spike</sub>             | mass $^{35}\text{Cl}$ spike solution             | (g)                                                  | 4.0142      | 4.0212     | 3.9983     | 4.0246     | 4.0128      | 3.99        | 3.9904      | 2.0037      | 3.0203     | 1.9977     | 2.0172     | 2.012       |
| C <sub>spike</sub>             | conc. spike solution                             | (g g <sup>-1</sup> )                                 | 0.998       | 0.998      | 0.995      | 0.995      | 0.995       | 0.995       | 0.995       | 0.995       | 0.998      | 0.998      | 0.998      | 0.998       |
| S/S                            | analytical stable isotope ratio                  | ( $^{35}\text{Cl}/(^{35}\text{Cl}+^{37}\text{Cl})$ ) | 5.15        | 5.666      | 5.512      | 5.57       | 5.117       | 5.104       | 5.57        | 4.284       | 8.36       | 6.12       | 6.39       | 5.82        |
| ±S/S                           | anal. st. isotope ratio unc.                     | ( $^{35}\text{Cl}/(^{35}\text{Cl}+^{37}\text{Cl})$ ) | 0.07        | 0.014      | 0.048      | 0.01       | 0.039       | 0.59        | 0.17        | 0.056       | 0.08       | 0.06       | 0.06       | 0.06        |
| R/S                            | analytical $^{36}\text{Cl}/\text{Cl}$ ratio      | $^{36}\text{Cl}/10^{15}\text{Cl}$                    | 526         | 985        | 678        | 559        | 352         | 374         | 328         | 322         | 441        | 475        | 516        | 774         |
| ±R/S                           | analytical $^{36}\text{Cl}/\text{Cl}$ ratio unc. | $^{36}\text{Cl}/10^{15}\text{Cl}$                    | 19          | 51         | 18         | 21         | 26          | 38          | 12          | 9           | 16         | 15         | 12         | 18          |

Table DR4. Field and analytical data for  $^{36}\text{Cl}$  samples.

| Sample Number                  |                                                  |                                                      | CM01-01-265 | CM01-02-15 | CM01-02-45 | CM01-02-70 | CM01-02-140 | CM01-02-245 | CM01-03-15 | CM01-03-45 | CM01-03-65 | CM01-03-100 | CM01-03-195 | NV00-02-35 |
|--------------------------------|--------------------------------------------------|------------------------------------------------------|-------------|------------|------------|------------|-------------|-------------|------------|------------|------------|-------------|-------------|------------|
| Depth                          | sample depth interval                            | (cm)                                                 | 265-275     | 15-25      | 45-55      | 70-80      | 140-150     | 245-255     | 15-20      | 45-55      | 65-75      | 100-110     | 195-205     | 25-35      |
| Depth                          | mass depth                                       | (g cm <sup>-2</sup> )                                | 407.3       | 31.1       | 84.3       | 131.3      | 278.6       | 505.3       | 23.3       | 68.5       | 95.9       | 143.9       | 274.0       | 31.8       |
| R <sub>36</sub>                | sample $^{36}\text{Cl}/\text{Cl}$ ratio          | ( $^{36}\text{Cl}/10^{15}\text{Cl}$ )                | 1139        | 1588       | 1535       | 1184       | 423         | 648         | 1147       | 743        | 794        | 582         | 603         | 2620       |
| ±R <sub>36</sub>               | sample $^{36}\text{Cl}/\text{Cl}$ 1σ uncertainty | ( $^{36}\text{Cl}/10^{15}\text{Cl}$ )                | 27          | 61         | 43         | 30         | 48          | 18          | 32         | 36         | 30         | 20          | 22          | 105        |
| ρ <sub>b</sub>                 | bulk density                                     | (g cm <sup>-3</sup> )                                | 1.57        | 1.74       | 1.88       | 1.88       | 2.16        | 2.16        | 1.37       | 1.37       | 1.37       | 1.37        | 1.37        | 1.51       |
| l <sub>s</sub>                 | sample thickness                                 | (cm)                                                 | 10          | 10         | 10         | 10         | 10          | 10          | 5          | 10         | 10         | 10          | 10          | 10         |
| θ <sub>avg</sub>               | water content                                    | (cm <sup>3</sup> /cm <sup>3</sup> )                  | 0.05        | 0.05       | 0.05       | 0.05       | 0.05        | 0.05        | 0.05       | 0.05       | 0.05       | 0.05        | 0.05        | 0.05       |
| Elev                           |                                                  | (m)                                                  | 1392        | 1413       | 1413       | 1413       | 1413        | 1413        | 1423       | 1423       | 1423       | 1423        | 1423        | 1846       |
| lat                            | degrees                                          |                                                      | 38.139      | 38.134     | 38.134     | 38.134     | 38.134      | 38.134      | 38.025     | 38.025     | 38.025     | 38.025      | 38.025      | 39.462     |
| long                           | degrees                                          |                                                      | -117.961    | -117.975   | -117.975   | -117.975   | -117.975    | -117.975    | -117.881   | -117.881   | -117.881   | -117.881    | -117.881    | -115.685   |
| S <sub>snow</sub>              | snow shielding                                   | (unitless)                                           | 1.0         | 1.0        | 1.0        | 1.0        | 1.0         | 1.0         | 1.0        | 1.0        | 1.0        | 1.0         | 1.0         | 1.0        |
| S <sub>T</sub>                 | total shielding                                  | (unitless)                                           | 1.0         | 1.0        | 1.0        | 1.0        | 1.0         | 1.0         | 1.0        | 1.0        | 1.0        | 1.0         | 1.0         | 1.0        |
| Λ <sub>f</sub>                 | effective atten. length                          | (g cm <sup>-2</sup> )                                | 170         | 170        | 170        | 170        | 170         | 170         | 170        | 170        | 170        | 170         | 170         | 170        |
| LOI                            | loss on ignition                                 | (wt %)                                               | 0           | 0          | 0          | 0          | 0           | 0           | 0          | 0          | 0          | 0           | 0           | 0          |
| Na <sub>2</sub> O              |                                                  | (wt %)                                               | 0.95        | 0.18       | 0.12       | 0.17       | 0.14        | 0.14        | 0.17       | 1.05       | 1.01       | 1.19        | 1.02        | 0.53       |
| MgO                            |                                                  | (wt %)                                               | 1.07        | 0.40       | 0.44       | 0.46       | 0.41        | 0.58        | 0.46       | 0.86       | 0.81       | 0.96        | 0.67        | 2.70       |
| Al <sub>2</sub> O <sub>3</sub> |                                                  | (wt %)                                               | 7.08        | 3.05       | 3.31       | 3.27       | 3.22        | 4.13        | 3.27       | 6.71       | 6.86       | 7.23        | 6.67        | 9.30       |
| SiO <sub>2</sub>               |                                                  | (wt %)                                               | 82.04       | 92.46      | 92.38      | 91.68      | 92.02       | 89.86       | 91.68      | 84.08      | 84.28      | 82.03       | 84.97       | 76.16      |
| P <sub>2</sub> O <sub>5</sub>  |                                                  | (wt %)                                               | 0.09        | 0.04       | 0.04       | 0.04       | 0.04        | 0.05        | 0.04       | 0.07       | 0.06       | 0.08        | 0.05        | 0.06       |
| K <sub>2</sub> O               |                                                  | (wt %)                                               | 1.40        | 0.84       | 0.93       | 0.90       | 0.89        | 1.18        | 0.90       | 1.48       | 1.56       | 1.63        | 1.57        | 2.06       |
| CaO                            |                                                  | (wt %)                                               | 0.22        | 0.02       | 0.02       | 0.03       | 0.03        | 0.03        | 0.03       | 1.21       | 1.11       | 1.31        | 1.04        | 1.81       |
| TiO <sub>2</sub>               |                                                  | (wt %)                                               | 0.90        | 0.14       | 0.16       | 0.15       | 0.15        | 0.17        | 0.15       | 0.42       | 0.39       | 0.40        | 0.33        | 0.46       |
| MnO                            |                                                  | (wt %)                                               | 0.02        | 0.00       | 0.00       | 0.00       | 0.00        | 0.01        | 0.00       | 0.04       | 0.02       | 0.03        | 0.02        | 0.03       |
| Fe <sub>2</sub> O <sub>3</sub> |                                                  | (wt %)                                               | 3.82        | 1.50       | 1.44       | 1.34       | 1.39        | 1.91        | 1.34       | 2.65       | 2.44       | 2.86        | 2.06        | 3.67       |
| Cl                             |                                                  | (ppm)                                                | 28.31       | 8.99       | 7.49       | 7.74       | 10.59       | 7.10        | 58.63      | 74.90      | 53.67      | 66.96       | 34.19       | 42.40      |
| B                              | (may be estimated)                               | (ppm)                                                | 39          | 26         | 23         | 22         | 24          | 30          | 28         | 32         | 32         | 36          | 30          | 6          |
| Sm                             | (estimated)                                      | (ppm)                                                | 12          | 12         | 12         | 12         | 12          | 12          | 12         | 12         | 12         | 12          | 12          | 12         |
| Gd                             | (may be estimated)                               | (ppm)                                                | 2           | 0          | 2          | 2          | 0           | 2           | 1          | 2          | 0          | 3           | 2           | 12         |
| U                              | (may be estimated)                               | (ppm)                                                | 2           | 1          | 2          | 1          | 2           | 2           | 1          | 2          | 2          | 2           | 1           | 4          |
| Th                             | (may be estimated)                               | (ppm)                                                | 4           | 1          | 3          | 1          | 0           | 2           | 1          | 4          | 4          | 4           | 4           | 5          |
| M <sub>sample</sub>            | sample mass                                      | (g)                                                  | 175.5133    | 70.1758    | 80.2569    | 81.2095    | 70.9439     | 125.4415    | 60.8197    | 60.7255    | 60.6282    | 60.0712     | 99.8804     | 70.1131    |
| M <sub>spike</sub>             | mass $^{35}\text{Cl}$ spike solution             | (g)                                                  | 1.0183      | 2.9984     | 3.0232     | 3.0018     | 2.9942      | 1.004       | 2.9844     | 3.0041     | 3.0152     | 3.0062      | 2.0018      | 3.0239     |
| C <sub>spike</sub>             | conc. spike solution                             | (g g <sup>-1</sup> )                                 | 0.998       | 0.998      | 0.998      | 0.998      | 0.998       | 0.998       | 0.998      | 0.998      | 0.998      | 0.998       | 0.998       | 0.995      |
| S/S                            | analytical stable isotope ratio                  | ( $^{35}\text{Cl}/(^{35}\text{Cl}+^{37}\text{Cl})$ ) | 3.96        | 21.42      | 22.42      | 21.5       | 18.63       | 7.68        | 6.52       | 5.81       | 6.88       | 6.16        | 5.51        | 7.23       |
| ±S/S                           | anal. st. isotope ratio unc.                     | ( $^{35}\text{Cl}/(^{35}\text{Cl}+^{37}\text{Cl})$ ) | 0.04        | 0.2        | 0.2        | 0.2        | 0.2         | 0.08        | 0.06       | 0.06       | 0.07       | 0.06        | 0.05        | 0.21       |
| R/S                            | analytical $^{36}\text{Cl}/\text{Cl}$ ratio      | $^{36}\text{Cl}/10^{15}\text{Cl}$                    | 944         | 273        | 252        | 203        | 84          | 303         | 621        | 445        | 410        | 332         | 378         | 1293       |
| ±R/S                           | analytical $^{36}\text{Cl}/\text{Cl}$ ratio unc. | $^{36}\text{Cl}/10^{15}\text{Cl}$                    | 22          | 11         | 7          | 5          | 10          | 8           | 17         | 21         | 15         | 11          | 14          | 50         |

Table DR4. Field and analytical data for <sup>36</sup>Cl samples.

| Sample Number                  |                                           |                                                           | NV00-02-50 | NV00-02-75 | NV00-02-95 | NV00-02-130 | NV00-02-160 | NV00-02-205 | NV00-01-55 | NV00-01-75 | NV00-01-90 | NV00-01-115 | NV00-01-140 | NV00-01-170 |
|--------------------------------|-------------------------------------------|-----------------------------------------------------------|------------|------------|------------|-------------|-------------|-------------|------------|------------|------------|-------------|-------------|-------------|
| Depth                          | sample depth interval                     | (cm)                                                      | 40-50      | 65-75      | 85-95      | 120-130     | 145-160     | 195-205     | 50-60      | 75-85      | 90-100     | 110-120     | 135-145     | 165-175     |
| Depth                          | mass depth                                | (g cm <sup>-2</sup> )                                     | 90.7       | 127.2      | 156.4      | 207.5       | 251.3       | 317.0       | 96.2       | 143.9      | 172.6      | 210.8       | 258.5       | 337.4       |
| R <sub>36</sub>                | sample <sup>36</sup> Cl/Cl ratio          | ( <sup>36</sup> Cl/10 <sup>15</sup> Cl)                   | 2251       | 1651       | 2056       | 1521        | 1768        | 1320        | 5119       | 4042       | 4107       | 4123        | 3006        | 2491        |
| ±R <sub>36</sub>               | sample <sup>36</sup> Cl/Cl 1σ uncertainty | ( <sup>36</sup> Cl/10 <sup>15</sup> Cl)                   | 115        | 66         | 99         | 128         | 78          | 71          | 108        | 150        | 58         | 124         | 132         | 127         |
| ρ <sub>b</sub>                 | bulk density                              | (g cm <sup>-3</sup> )                                     | 2.08       | 1.46       | 1.46       | 1.46        | 1.46        | 1.46        | 1.91       | 1.91       | 1.90       | 1.90        | 1.90        | 1.24        |
| l <sub>s</sub>                 | sample thickness                          | (cm)                                                      | 10         | 10         | 10         | 10          | 15          | 10          | 10         | 10         | 10         | 10          | 10          | 10          |
| θ <sub>avg</sub>               | water content                             | (cm <sup>3</sup> /cm <sup>3</sup> )                       | 0.05       | 0.05       | 0.05       | 0.05        | 0.05        | 0.05        | 0.05       | 0.05       | 0.05       | 0.05        | 0.05        | 0.05        |
| Elev                           |                                           | (m)                                                       | 1846       | 1846       | 1846       | 1846        | 1846        | 1846        | 1856       | 1856       | 1856       | 1856        | 1856        | 1856        |
| lat                            | degrees                                   |                                                           | 39.462     | 39.462     | 39.462     | 39.462      | 39.462      | 39.462      | 39.462     | 39.462     | 39.462     | 39.462      | 39.462      | 39.462      |
| long                           | degrees                                   |                                                           | -115.685   | -115.685   | -115.685   | -115.685    | -115.685    | -115.685    | -115.687   | -115.687   | -115.687   | -115.687    | -115.687    | -115.687    |
| S <sub>snow</sub>              | snow shielding                            | (unitless)                                                | 1.0        | 1.0        | 1.0        | 1.0         | 1.0         | 1.0         | 1.0        | 1.0        | 1.0        | 1.0         | 1.0         | 1.0         |
| S <sub>T</sub>                 | total shielding                           | (unitless)                                                | 1.0        | 1.0        | 1.0        | 1.0         | 1.0         | 1.0         | 1.0        | 1.0        | 1.0        | 1.0         | 1.0         | 1.0         |
| Λ <sub>f</sub>                 | effective atten. length                   | (g cm <sup>-2</sup> )                                     | 170        | 170        | 170        | 170         | 170         | 170         | 170        | 170        | 170        | 170         | 170         | 170         |
| LOI                            | loss on ignition                          | (wt %)                                                    | 0          | 0          | 0          | 0           | 0           | 0           | 0          | 0          | 0          | 0           | 0           | 0           |
| Na <sub>2</sub> O              |                                           | (wt %)                                                    | 0.77       | 0.76       | 0.72       | 0.61        | 0.60        | 0.64        | 0.59       | 0.55       | 0.55       | 0.40        | 0.47        | 0.48        |
| MgO                            |                                           | (wt %)                                                    | 3.58       | 3.00       | 2.54       | 2.86        | 2.49        | 2.64        | 1.11       | 2.19       | 1.58       | 1.70        | 1.79        | 2.07        |
| Al <sub>2</sub> O <sub>3</sub> |                                           | (wt %)                                                    | 11.27      | 9.82       | 8.94       | 9.84        | 9.26        | 9.79        | 7.55       | 8.67       | 6.76       | 7.37        | 7.66        | 8.13        |
| SiO <sub>2</sub>               |                                           | (wt %)                                                    | 71.59      | 75.69      | 77.60      | 74.57       | 77.36       | 74.70       | 81.50      | 75.62      | 82.88      | 80.58       | 81.86       | 80.20       |
| P <sub>2</sub> O <sub>5</sub>  |                                           | (wt %)                                                    | 0.05       | 0.04       | 0.05       | 0.06        | 0.05        | 0.05        | 0.04       | 0.05       | 0.05       | 0.05        | 0.04        | 0.04        |
| K <sub>2</sub> O               |                                           | (wt %)                                                    | 2.38       | 2.10       | 1.93       | 1.95        | 1.90        | 2.09        | 1.60       | 1.65       | 1.42       | 1.52        | 1.45        | 1.68        |
| CaO                            |                                           | (wt %)                                                    | 1.61       | 1.16       | 1.12       | 1.86        | 1.28        | 1.21        | 0.41       | 0.94       | 0.66       | 1.28        | 0.72        | 0.69        |
| TiO <sub>2</sub>               |                                           | (wt %)                                                    | 0.58       | 0.54       | 0.51       | 0.49        | 0.48        | 0.53        | 0.41       | 0.41       | 0.39       | 0.38        | 0.40        | 0.41        |
| MnO                            |                                           | (wt %)                                                    | 0.04       | 0.03       | 0.03       | 0.03        | 0.03        | 0.03        | 0.01       | 0.02       | 0.02       | 0.02        | 0.02        | 0.02        |
| Fe <sub>2</sub> O <sub>3</sub> |                                           | (wt %)                                                    | 4.79       | 3.92       | 3.39       | 3.68        | 3.65        | 4.72        | 3.62       | 6.07       | 3.03       | 3.36        | 3.15        | 3.50        |
| Cl                             |                                           | (ppm)                                                     | 47.00      | 49.02      | 47.03      | 45.75       | 38.19       | 48.69       | 24.67      | 33.33      | 24.08      | 28.17       | 29.22       | 39.37       |
| B                              | (may be estimated)                        | (ppm)                                                     | 6          | 6          | 6          | 6           | 6           | 6           | 6          | 52         | 46         | 45          | 47          | 53          |
| Sm                             | (estimated)                               | (ppm)                                                     | 12         | 12         | 12         | 12          | 12          | 12          | 12         | 12         | 12         | 12          | 12          | 12          |
| Gd                             | (may be estimated)                        | (ppm)                                                     | 12         | 12         | 12         | 12          | 12          | 12          | 12         | 3          | 1          | 1           | 0           | 2           |
| U                              | (may be estimated)                        | (ppm)                                                     | 4          | 4          | 4          | 4           | 4           | 4           | 2          | 5          | 3          | 5           | 4           | 4           |
| Th                             | (may be estimated)                        | (ppm)                                                     | 5          | 5          | 5          | 5           | 5           | 5           | 6          | 6          | 3          | 4           | 3           | 3           |
| M <sub>sample</sub>            | sample mass                               | (g)                                                       | 60.0967    | 60.3523    | 59.443     | 59.4668     | 60.3592     | 80.2359     | 40.604     | 60.9986    | 90.2411    | 71.0279     | 50.023      | 50.8498     |
| M <sub>spike</sub>             | mass <sup>35</sup> Cl spike solution      | (g)                                                       | 4.0142     | 3.017      | 3.0125     | 3.0012      | 2.9955      | 2.0104      | 4.0059     | 3.9921     | 2.9894     | 3.0115      | 5.0034      | 3.0181      |
| C <sub>spike</sub>             | conc. spike solution                      | (g g <sup>-1</sup> )                                      | 0.995      | 0.995      | 0.995      | 0.995       | 0.995       | 0.995       | 0.998      | 0.995      | 0.995      | 0.995       | 0.995       | 0.995       |
| S/S                            | analytical stable isotope ratio           | ( <sup>35</sup> Cl/( <sup>35</sup> Cl+ <sup>37</sup> Cl)) | 8.83       | 7.24       | 7.47       | 7.572       | 8.35        | 5.214       | 18.68      | 10.95      | 8.65       | 9.16        | 16.5        | 9.17        |
| ±S/S                           | anal. st. isotope ratio unc.              | ( <sup>35</sup> Cl/( <sup>35</sup> Cl+ <sup>37</sup> Cl)) | 0.08       | 0.08       | 0.2        | 0.044       | 0.12        | 0.05        | 0.19       | 0.4        | 0.5        | 0.3         | 0.1         | 0.26        |
| R/S                            | analytical <sup>36</sup> Cl/Cl ratio      | <sup>36</sup> Cl/10 <sup>15</sup> Cl                      | 925        | 814        | 985        | 720         | 765         | 1320        | 1014       | 1356       | 1720       | 1637        | 675         | 988         |
| ±R/S                           | analytical <sup>36</sup> Cl/Cl ratio unc. | <sup>36</sup> Cl/10 <sup>15</sup> Cl                      | 47         | 32         | 50         | 60          | 34          | 70          | 22         | 50         | 70         | 50          | 30          | 50          |

Table DR4. Field and analytical data for  $^{36}\text{Cl}$  samples.

| Sample Number                  |                                                  |                                                      | P00-01-40 | P00-01-65 | P00-01-110 | P00-01-150 | P00-01-240 | P00-02-40 | P00-02-65 | P00-02-85 | P00-02-140 | P00-02-190 | P00-02-280 | P00-03-45 |
|--------------------------------|--------------------------------------------------|------------------------------------------------------|-----------|-----------|------------|------------|------------|-----------|-----------|-----------|------------|------------|------------|-----------|
| Depth                          | sample depth interval                            | (cm)                                                 | 25-40     | 55-65     | 95-110     | 130-150    | 210-240    | 30-40     | 50-65     | 75-85     | 135-140    | 170-190    | 270-280    | 35-45     |
| Depth                          | mass depth                                       | (g cm <sup>-2</sup> )                                | 58.6      | 94.1      | 188.4      | 262.0      | 429.4      | 61.3      | 105.8     | 143.6     | 226.8      | 299.3      | 426.1      | 56.3      |
| R <sub>36</sub>                | sample $^{36}\text{Cl}/\text{Cl}$ ratio          | ( $^{36}\text{Cl}/10^{15}\text{Cl}$ )                | 2045      | 2073      | 1399       | 1555       | 1050       | 3144      | 3219      | 2795      | 2156       | 1885       | 1704       | 3265      |
| ±R <sub>36</sub>               | sample $^{36}\text{Cl}/\text{Cl}$ 1σ uncertainty | ( $^{36}\text{Cl}/10^{15}\text{Cl}$ )                | 49        | 43        | 33         | 59         | 44         | 72        | 67        | 131       | 127        | 72         | 68         | 127       |
| ρ <sub>b</sub>                 | bulk density                                     | (g cm <sup>-3</sup> )                                | 1.42      | 1.91      | 1.86       | 1.86       | 1.86       | 1.71      | 1.71      | 1.85      | 1.51       | 1.51       | 1.45       | 1.48      |
| l <sub>s</sub>                 | sample thickness                                 | (cm)                                                 | 15        | 10        | 15         | 20         | 30         | 10        | 15        | 10        | 5          | 20         | 10         | 10        |
| θ <sub>avg</sub>               | water content                                    | (cm <sup>3</sup> /cm <sup>3</sup> )                  | 0.05      | 0.05      | 0.05       | 0.05       | 0.05       | 0.05      | 0.05      | 0.05      | 0.05       | 0.05       | 0.05       | 0.05      |
| Elev                           |                                                  | (m)                                                  | 1849      | 1849      | 1849       | 1849       | 1849       | 1854      | 1854      | 1854      | 1854       | 1854       | 1854       | 1863      |
| lat                            | degrees                                          |                                                      | 39.452    | 39.452    | 39.452     | 39.452     | 39.452     | 39.456    | 39.456    | 39.456    | 39.456     | 39.456     | 39.456     | 39.453    |
| long                           | degrees                                          |                                                      | -115.673  | -115.673  | -115.673   | -115.673   | -115.673   | -115.674  | -115.674  | -115.674  | -115.674   | -115.674   | -115.674   | -115.666  |
| S <sub>snow</sub>              | snow shielding                                   | (unitless)                                           | 1.0       | 1.0       | 1.0        | 1.0        | 1.0        | 1.0       | 1.0       | 1.0       | 1.0        | 1.0        | 1.0        | 1.0       |
| S <sub>T</sub>                 | total shielding                                  | (unitless)                                           | 1.0       | 1.0       | 1.0        | 1.0        | 1.0        | 1.0       | 1.0       | 1.0       | 1.0        | 1.0        | 1.0        | 1.0       |
| Λ <sub>f</sub>                 | effective atten. length                          | (g cm <sup>-2</sup> )                                | 170       | 170       | 170        | 170        | 170        | 170       | 170       | 170       | 170        | 170        | 170        | 170       |
| LOI                            | loss on ignition                                 | (wt %)                                               | 0         | 0         | 0          | 0          | 0          | 0         | 0         | 0         | 0          | 0          | 0          | 0         |
| Na <sub>2</sub> O              |                                                  | (wt %)                                               | 0.32      | 0.31      | 0.35       | 0.27       | 0.50       | 0.59      | 0.85      | 0.61      | 0.69       | 0.59       | 0.60       | 0.60      |
| MgO                            |                                                  | (wt %)                                               | 0.32      | 0.30      | 0.37       | 0.22       | 0.27       | 0.37      | 0.82      | 0.52      | 0.62       | 0.37       | 0.56       | 0.57      |
| Al <sub>2</sub> O <sub>3</sub> |                                                  | (wt %)                                               | 2.47      | 2.79      | 2.91       | 2.62       | 3.04       | 3.21      | 5.50      | 3.71      | 4.29       | 3.21       | 4.03       | 3.56      |
| SiO <sub>2</sub>               |                                                  | (wt %)                                               | 93.42     | 93.04     | 91.69      | 93.65      | 92.55      | 91.03     | 83.85     | 88.95     | 87.20      | 91.03      | 88.32      | 88.24     |
| P <sub>2</sub> O <sub>5</sub>  |                                                  | (wt %)                                               | 0.03      | 0.03      | 0.04       | 0.03       | 0.03       | 0.04      | 0.06      | 0.05      | 0.05       | 0.04       | 0.04       | 0.06      |
| K <sub>2</sub> O               |                                                  | (wt %)                                               | 0.59      | 0.63      | 0.70       | 0.83       | 0.84       | 0.89      | 1.41      | 0.96      | 1.09       | 0.89       | 1.02       | 0.91      |
| CaO                            |                                                  | (wt %)                                               | 0.16      | 0.09      | 0.35       | 0.08       | 0.15       | 0.58      | 1.15      | 0.93      | 1.01       | 0.58       | 0.68       | 1.21      |
| TiO <sub>2</sub>               |                                                  | (wt %)                                               | 0.12      | 0.14      | 0.13       | 0.11       | 0.11       | 0.16      | 0.34      | 0.23      | 0.27       | 0.16       | 0.24       | 0.23      |
| MnO                            |                                                  | (wt %)                                               | 0.01      | 0.01      | 0.01       | 0.01       | 0.01       | 0.01      | 0.03      | 0.02      | 0.02       | 0.01       | 0.02       | 0.02      |
| Fe <sub>2</sub> O <sub>3</sub> |                                                  | (wt %)                                               | 1.51      | 1.39      | 1.51       | 1.07       | 1.05       | 1.52      | 3.65      | 2.03      | 2.46       | 1.52       | 2.86       | 2.17      |
| Cl                             |                                                  | (ppm)                                                | 60.43     | 55.97     | 66.06      | 91.61      | 97.59      | 56.75     | 72.80     | 93.53     | 77.52      | 106.35     | 104.42     | 97.58     |
| B                              | (may be estimated)                               | (ppm)                                                | 22        | 21        | 20         | 19         | 21         | 31        | 36        | 40        | 32         | 30         | 29         | 6         |
| Sm                             | (estimated)                                      | (ppm)                                                | 12        | 12        | 12         | 12         | 12         | 12        | 12        | 12        | 12         | 12         | 12         | 12        |
| Gd                             | (may be estimated)                               | (ppm)                                                | 0         | 0         | 0          | 0          | 0          | 0         | 1         | 2         | 1          | 0          | 0          | 12        |
| U                              | (may be estimated)                               | (ppm)                                                | 3         | 3         | 1          | 3          | 3          | 3         | 4         | 3         | 3          | 3          | 4          | 4         |
| Th                             | (may be estimated)                               | (ppm)                                                | 0.01      | 0.01      | 2          | 2          | 2          | 1         | 0.01      | 1         | 1          | 1          | 2          | 3         |
| M <sub>sample</sub>            | sample mass                                      | (g)                                                  | 71.5391   | 71.0004   | 61.7488    | 69.8833    | 101.3802   | 70.3326   | 58.9319   | 50.2395   | 61.9452    | 70.3326    | 99.9381    | 50.2629   |
| M <sub>spike</sub>             | mass $^{35}\text{Cl}$ spike solution             | (g)                                                  | 3.0056    | 2.9898    | 2.9977     | 2.9733     | 3.0133     | 2.9917    | 3.0129    | 2.9996    | 2.99       | 2.9917     | 2.0092     | 4.0068    |
| C <sub>spike</sub>             | conc. spike solution                             | (g g <sup>-1</sup> )                                 | 0.998     | 0.998     | 0.998      | 0.995      | 0.995      | 0.995     | 0.995     | 0.995     | 0.995      | 0.995      | 0.995      | 0.995     |
| S/S                            | analytical stable isotope ratio                  | ( $^{35}\text{Cl}/(^{35}\text{Cl}+^{37}\text{Cl})$ ) | 5.95      | 6.18      | 6.11       | 5.011      | 4.363      | 6.16      | 5.97      | 5.713     | 5.64       | 4.75       | 3.907      | 6.43      |
| ±S/S                           | anal. st. isotope ratio unc.                     | ( $^{35}\text{Cl}/(^{35}\text{Cl}+^{37}\text{Cl})$ ) | 0.06      | 0.06      | 0.06       | 0.04       | 0.06       | 0.06      | 0.06      | 0.05      | 0.06       | 0.08       | 0.05       | 0.09      |
| R/S                            | analytical $^{36}\text{Cl}/\text{Cl}$ ratio      | $^{36}\text{Cl}/10^{15}\text{Cl}$                    | 1200      | 1177      | 931        | 1059       | 803        | 1790      | 1884      | 1700      | 1326       | 1343       | 1427       | 1790      |
| ±R/S                           | analytical $^{36}\text{Cl}/\text{Cl}$ ratio unc. | $^{36}\text{Cl}/10^{15}\text{Cl}$                    | 28        | 25        | 22         | 40         | 30         | 42        | 40        | 80        | 56         | 50         | 60         | 70        |
